# Supplementary material for: Exploring the structural stability and electrochemical performance of B doped T-graphene nanotubes from first-principles calculations
Source: Royal Society of Chemistry journal article supplement (doi:10.1039/d3cp04143c), 2023-11-29
Supplement: d3cp04143c1.pdf [file d3cp04143c1.pdf]

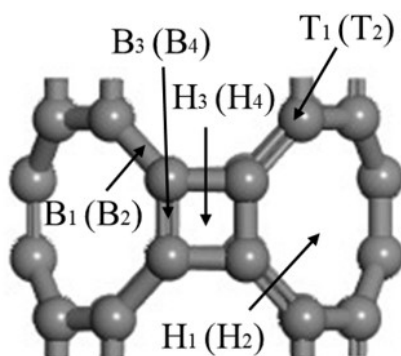

Fig. S1 Structure of T-graphene nanotubes

Table S1 Adsorption energy of lithium ions at different sites inside and outside T-graphene

| nanotubes     |                |                |                |                |                |
|---------------|----------------|----------------|----------------|----------------|----------------|
|               | H <sub>1</sub> | H <sub>2</sub> | H <sub>3</sub> | H <sub>4</sub> | T <sub>1</sub> |
| $E_{ad}$ (eV) | -0.51          | -0.38          | -0.44          | -0.30          | -0.38          |
|               | T <sub>2</sub> | B <sub>1</sub> | B <sub>2</sub> | B <sub>3</sub> | B <sub>4</sub> |
| $E_{ad}$ (eV) | -0.36          | -0.22          | -0.24          | -0.31          | -0.32          |

Table S2 Formation energies ( $E_f$ ) of T-graphene nanotubes with different tube diameters

| Tube diameters | (4,0) | (5,0) | (6,0) | (7,0) | (8,0) |
|----------------|-------|-------|-------|-------|-------|
| $E_f$ (eV)     | -6.89 | -6.96 | -6.99 | -7.01 | -7.02 |

Table S3 The B-C bond length of T-graphene nanotubes with tube length N=1, 2, 3 and 4

| Bond length | N=1   | N=2   | N=3   | N=4   |
|-------------|-------|-------|-------|-------|
| B-C1 (Å)    | 1.523 | 1.527 | 1.521 | 1.528 |
| B-C2 (Å)    | 1.495 | 1.501 | 1.507 | 1.495 |

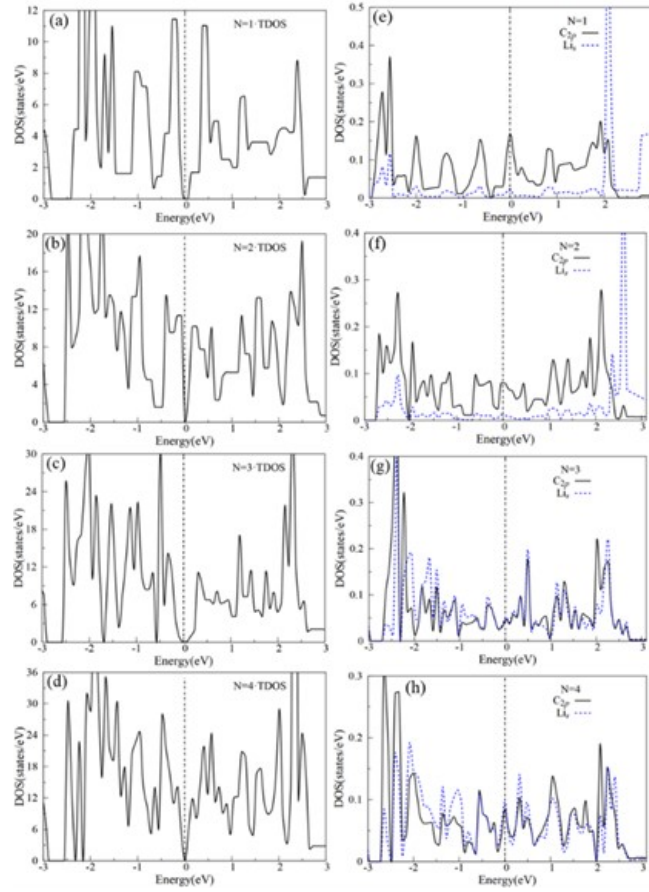

Fig. S2 (a-d) TDOS of intrinsic T-CNTs with different lengths, (e-h) PDOS of T-CNTs with different lengths after adsorbing lithium ions.

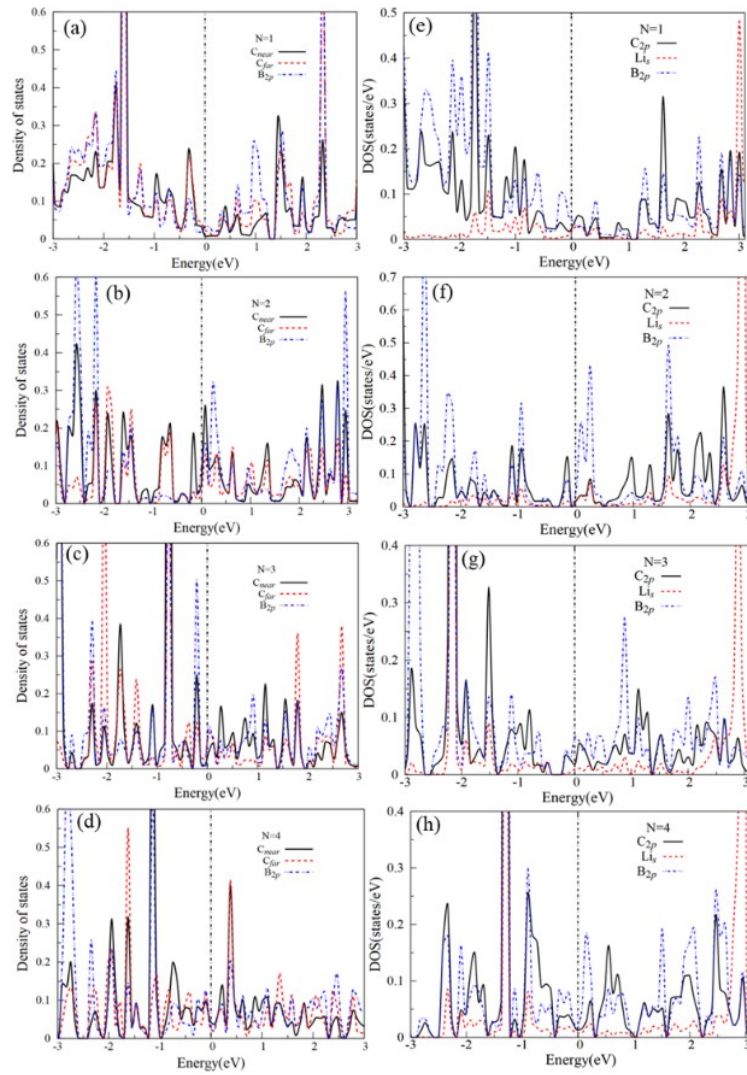

Fig. S3 (a-d) PDOS for B doped T-CNTs of different tube lengths ( $N=1, 2, 3, 4$ ), (e-h) PDOS of B doped T-CNTs with different tube lengths adsorbing lithium ions.

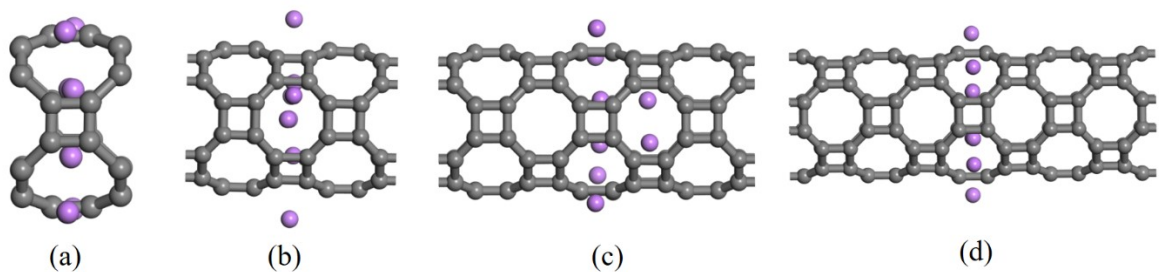

Fig. S4 The adsorption of lithium ions on T-CNTs with tube lengths  $N=1, 2, 3$ , and  $4$ . Gray and purple atoms represent C and Li atoms, respectively.

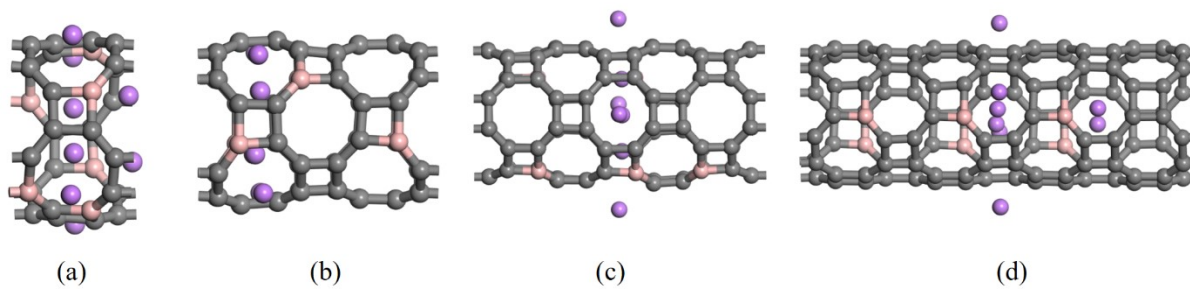

Fig. S5 The adsorption of lithium ions on B doped T-CNTs with tube lengths  $N=1, 2, 3,$  and  $4$ . Gray, pink and purple atoms represent C, B and Li atoms, respectively.
